# Supplementary material
Source: Research Square preprint supplement (doi:10.21203/rs.3.rs-8925287/v1)
Supplement: Supplementary file 1 [file 4dfbc47670883e5df238fa70.docx]

# Supplementary Materials

**Table S1**: The total of 24 of Digital Mobility Outcomes (DMOs) extracted by MobGap v1.0 pipeline

|  | Parameter | Unit | Daily calculation |
| --- | --- | --- | --- |
| *Walking*  *Activity* | *Amount* | | |
| **Walking duration** | **minutes/day** | **Daily sum of WB duration using all WB** |
| **Number of steps** | **#/day** | **Sum of steps using all WB** |
| *Pattern* | | |
| **Number of WB** | **#/day** | **Daily sum of all WB** |
| Number of WB > 10s | #/day | Daily sum of number of WB longer than 10s |
| **Number of WB > 30s** | **#/day** | **Daily sum of number of WB longer than 30s** |
| Number of WB > 60s | #/day | Daily sum of number of WB longer than 60s |
| WB duration | Sec | Daily median of WB duration using all WB |
| P90 WB duration | Sec | Daily P90 of WB duration using all WB |
| WB duration bout to bout variability | - | Daily COV of WB duration using all WB |
| *Gait Quality* | *Pace* | | |
| Walking speed in shorter (10-30s) WB | m/s | Daily mean of walking speed using WB between 10s and 30s |
| **Walking speed in longer (>30s) WB** | **m/s** | **Daily mean of walking speed using WB longer than 30s** |
| P90 walking speed in WB > 10 s | m/s | Daily P90 of walking speed using WB longer than 10s |
| **P90 walking speed in longer (>30s) WB** | **m/s** | **Daily P90 of walking speed using WB longer than 30s** |
| Stride length in shorter (10-30s) WB | Cm | Daily mean of stride length using WB between 10s and 30s |
| Stride length in longer (>30s) WB | Cm | Daily mean of stride length using WB longer than 30s |
| *Rhythm* | | |
| Cadence in all WB | steps/min | Daily mean of cadence using all WB |
| Cadence in longer (>30s) WB | steps/min | Daily mean of cadence using WB longer than 30s |
| P90 cadence in longer (>30s) WB | steps/min | Daily P90 using WB longer than 30s |
| Stride duration in all WB | Sec | Daily mean of stride duration using all WB |
| Stride duration in longer (>30s) WB | Sec | Daily mean of stride duration using WB longer than 30s |
| *Bout-to-Bout Variability* | | |
| Walking speed bout-to-bout-variability in longer (>30s) WBs | % | Daily COV of walking speed using WB longer than 30s |
| Stride length bout to bout variability in longer (>30s) WBs | % | Daily COV of stride length using WB longer than 30s |
| Cadence bout to bout variability | % | Daily COV using all WB |
| Stride duration bout to bout variability | % | Daily COV of stride duration using all WB |

Presented are the 24 DMOs Note: bold letters represent DMOs shown in the present study.

Abbreviations:WB: Walking Bout; P90: 90th Percentile; COV: Coefficient of Variation

**Figure S2**: Distribution of Digital Mobility Outcomes (DMOs)


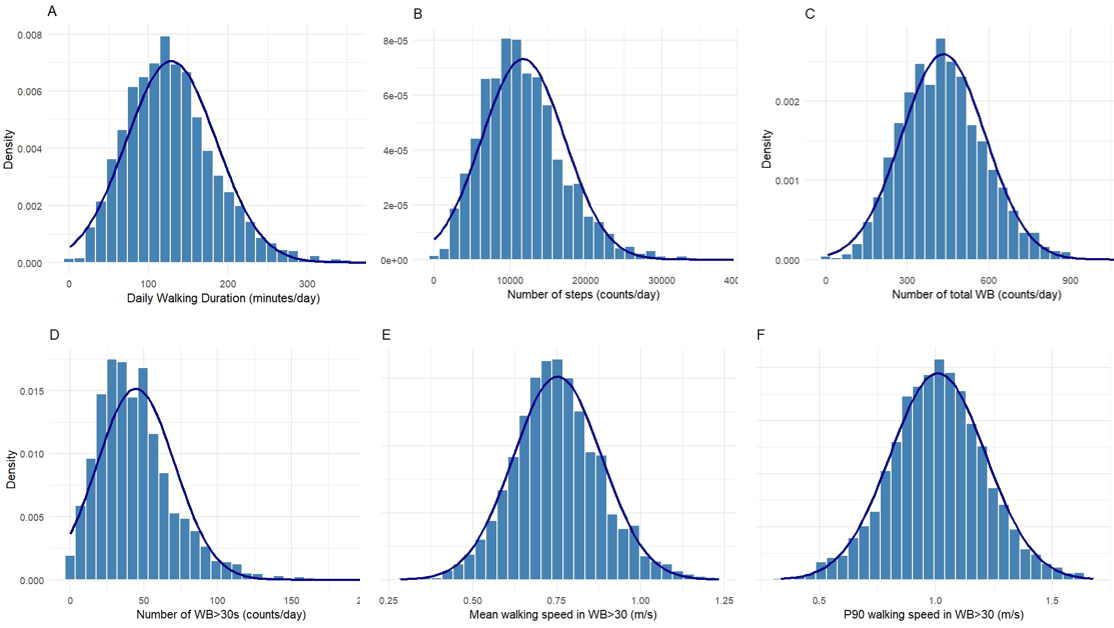


Notes: Presented are histograms for daily walking duration, number of steps, number of total walking bouts (WB), number of walking bouts >30s, mean walking speed >30s, Percentile 90 walking speed >30s

**Table S3**: Descriptive results of all 24 Digital Mobility Outcomes (DMOs)

| **DMO** | **Mean (SD)** | **Md (P25 - P75)** |
| --- | --- | --- |
| **Amount** | | |
| Walking duration, min/day | 128.8 (56.5) | 124.1 (88.2 - 161.2) |
| Number of steps, counts/day | 11 746 (5 446) | 11 129 (7 834 – 14 814) |
| ***Pattern*** | | |
| Number of WBs, counts/day | 432.3 (153.8) | 426.0 (322.0 - 527.0) |
| Number of WB>10s, counts/day | 207.2 (79.7) | 200.0 (150.0 - 255.0) |
| Number of WB >30s, counts/day | 44.5 (26.3) | 40.0 (26.0 - 58.0) |
| Number of WB>60s, counts/day | 14.5 (11.8) | 12.0 (6.0 - 20.0) |
| WB duration, s | 9.8 (1.4) | 9.5 (8.9 - 10.6) |
| P90 WBs duration, s | 31.5 (11.8) | 29.2 (25.0 - 34.6) |
| WBs duration bout-to-bout variability | 177.2 (97.8) | 155.9 (105.5 - 219.0) |
| ***Pace*** | | |
| Walking speed in shorter (10-30s) WBs, m/s | 0.60 (0.07) | 0.60 (0.55 - 0.64) |
| Walking speed in longer (>30s) WBs, m/s | 0.75 (0.13) | 0.75 (0.67 - 0.83) |
| P90 walking speed in WBs (>10s), m/s | 0.87 (0.15) | 0.87 (0.78 - 0.95) |
| P90 walking speed in longer (>30 s) WBs, m/s | 1.01 (0.20) | 1.01 (0.88 - 1.14) |
| Stride length in shorter (10–30 s) WBs, m | 0.80 (0.08) | 0.80 (0.75 - 0.85) |
| Stride length in longer (>30 s) WBs, cm | 0.96 (0.13) | 0.95 (0.87 - 1.04) |
| **Rhythm** | | |
| Cadence in all WBs, steps/min | 86.2 (3.9) | 86.0 (83.6 - 88.8) |
| Cadence in longer (>30s) WBs, steps/min | 92.0 (6.1) | 91.7 (87.9 - 95.8) |
| P90 cadence in longer (>30s) WBs, steps/min | 103.2 (8.2) | 103.0 (97.6 - 109.0) |
| Mean stride duration in all WB, s | 1.27 (0.06) | 1.27 (1.23 - 1.31) |
| Stride duration in longer (>30 s) WBs, s | 1.23 (0.08) | 1.23 (1.18 - 1.28) |
| ***Variability*** | | |
| Walking speed bout-to-bout variability in longer (>30 s) WBs | 26.3 (7.6) | 26.2 (21.4 - 31.0) |
| Stride length bout-to-bout variability in longer (>30 s) WBs | 19.6 (5.9) | 19.3 (15.8 - 23.1) |
| Cadence bout-to-bout variability | 12.6 (1.5) | 12.6 (11.6 - 13.5) |
| Stride duration bout-to-bout variability | 15.9 (2.1) | 15.7 (14.5 - 16.9) |

**Table S4.** Reasons for exclusion of data exclusion

| **Reason** | **Number** |
| --- | --- |
| Technical failure (missing gyroscope data, flat data) | n=35 |
| Early removal/insufficient wear-time for unknown reasons | n=24 |
| Early removal due medical reasons  Allergy  Surgical procedure during measurement period | n=4  n=3  n=1 |
| Missing data sets for unknown reasons | n=8 |
| Failure of initialization/upload | n=3 |
| Denial of wearing the sensor | n=3 |
| Loss of sensor | n=1 |
| Exclusion for analysis due,medical reasons  Parkinson’s Disease  Not able,to walk/wheelchair user | n=2  n=1  n=1 |

**Table S5.** Fixed effects of socio-demographic indicators, weekday and environmental conditions on Digital Mobility Outcomes (DMOs)

| **Predicting Variables** | ***Outcomes*** | | | | | | | | | | | |
| --- | --- | --- | --- | --- | --- | --- | --- | --- | --- | --- | --- | --- |
| *Walking Duration, minutes/day* | | *Number of steps, counts/day* | | *Number of total WBs, counts/day* | | *Number of longer (>30s) WBs, counts/day* | | *Mean walking speed longer (>30s) in WB, m/s a* | | *P90 walking speed in longer (>30s) WBs, m/s* | |
| *(95% CI)* | *p* | *(95% CI)* | *p* | *(95% CI)* | *p* | *(95% CI)* | *p* | *(95% CI)* | *p* | *(95% CI)* | *p* |
| *Age* | -0.13  (-0.20, -0.06) | **<0.001** | -0.14  (-0.21, -0.07) | **<0.001** | -0.10  (-0.17, -0.02) | **0.009** | -0.11  (-0.18, -0.04) | **0.002** | -0.23  (-0.30, -0.16) | **<0.001** | -0.26  (-0.33, -0.19) | **<0.001** |
| *Sex [male]* | -0.06  (-0.20, 0.09) | 0.451 | -0.07  (-0.22, 0.07) | 0.303 | -0.29  (-0.44, -0.14) | **<0.001** | 0.17  (0.03, 0.32) | **0.019** | 0.12  (-0.03, 0.26) | 0.095 | 0.20  (0.06, 0.35) | **0.006** |
| *Education (high)* | 0.09  (0.02, 0.16) | **0.009** | 0.09 (0.02,0.16) | **0.011** | 0.02  (-0.05, 0.10) | 0.550 | 0.08  (0.01, 0.15) | **0.025** | 0.00  (-0.08, 0.06) | 0.797 | 0.01  (-0.06, 0.08) | 0.757 |
| *Living Status (with partner)* | -0.04  (-0.11, 0.19) | 0.587 | 0.03  (-0.11, 0.18) | 0.655 | 0.10  (-0.06, 0.25) | 0.222 | 0.12  (-0.03, 0.27) | 0.107 | -0.10  (-0.25, 0.05) | 0.192 | -0.09  (-0.24, 0.06) | 0.257 |
| *Weekday (weekend)* | -0.12  (-0.22, -0.02) | 0.073 | -0.11  (-0.20, -0.02) | 0.072 | -0.21  (-0.39, -0.03) | 0.072 | -0.18  (-0.30, -0.06) | **0.032** | -0.09  (-0.14, -0.05) | **<0.001** | -0.15  (-0.23, -0.07) | **0.013** |
| *Daylight hours* | 0.07  (0.00, 0.14) | **0.037** | 0.07  (0.00, 0.14 | **0.045** | 0.03  (-0.05, 0.10) | 0.461 | 0.08  (0.01, 0.15) | **0.031** | -0.02  (-0.09,0.05) | 0.558 | -0.07  (-0.14, 0.00) | 0.051 |
| *City (Mannheim)* | -0.02  (-0.16, 0.12) | 0.758 | -0.00  (-0.15, 0.13) | 0.915 | 0.07  (-0.07, 0.22) | 0.311 | -0.02  (-0.16, 0.12) | 0.741 | 0.03  (-0.11, 0.17) | 0.664 | 0.03  (-0.11, 0.17) | 0.687 |
| *Marginal R²* | 3% | | 3% | | 4% | | 5% | | 5% | | 8% | |
| *Conditional R²* | 56% | | 56% | | 66% | | 59% | | 61% | | 63% | |

Notes: Presented are standardized Beta-Coefficients, 95% Confidence Intervals (95% CI) and *p*-values based on Linear Mixed Models (LMMs). P-values <.05 are written in bold numbers. Notes: a For the LMM, predict mean walking speed in WB>30s, weekday was deleted as random factor, as the model showed singularity and random-effect variance of weekday was estimated at zero. For the dichotomous variables of sex, living status, weekday/weekend and City the reference categories are written in brackets.

**Table S6.** Random-effect variance components for all steps of the hierarchical linear mixed models (LMMs) predicting daily mobility outcomes.

| **DMO** | **Random Effect Variance** | **Hierarchical Model Step** | | | |
| --- | --- | --- | --- | --- | --- |
| *Step 1* | *Step 2* | *Step 3* | *Step 4* |
| **Walking Duration,** | *Participant* | 1688.6 | 1686.3 | 1688.6 | 1416.8 |
| *Weekday* | 8.7 | 8.7 | a | 19.8 |
| *Residual* | 1333.2 | 1333.2 | 1333.2 | 1369.0 |
| **Number of steps** | *Participant* | 15166148 | 15125793 | 15167384 | 12662884 |
| *Weekday* | 65984 | 65967 | a | 154083 |
| *Residual* | 12733433 | 12733868 | 12733489 | 13155255 |
| **Number of total WBs** | *Participant* | 14130 | 14139 | 14130 | 12790 |
| *Weekday* | 261.8 | 261.9 | a | 494.5 |
| *Residual* | 7921 | 7921 | 7921 | 8008 |
| **Number of longer (>30s) WBs** | *Participant* | 370.0 | 370.5 | 370.0 | 335.9 |
| *Weekday* | 3.1 | 3.1 | a | 3.4 |
| *Residual* | 281.3 | 281.3 | 281.3 | 285.9 |
| **Mean walking speed in longer (>30s) WBs** | *Participant* | 0.01 | 0.01 | 0.01 | 0.01 |
| *Weekday* | b | b | a | b |
| *Residual* | 0.01 | 0.01 | 0.01 | 0.01 |
| **P90 walking speed in longer (>30s) WBs** | *Participant* | 0.02 | 0.02 | 0.02 | 0.02 |
| *Weekday* | 0.00c | 0.00 c | a | 0.00 c |
| *Residual* | 0.02 | 0.02 | 0.02 | 0.02 |

Notes: Presented are variances for the random effects of the individual participant, weekday and residuals for each of the hierarchical linear model steps. a In LMMs of Step 3, the random effect of weekday was not included, as all seven weekday levels were specified as fixed effects. Adding weekday as both a fixed and random factor would have resulted in an overparameterized and non-identifiable model; b In Step 1,2 and 4 the model for mean walking speed in WB>30s did not converge with weekday as a random effect because its variance component was estimated as zero, indicating no detectable between-weekday variability in this outcome. Therefore, no random-effect variance for weekday could be reported for this model. c Variance components reported as 0.00 reflect very small, non-zero estimates that occurred beyond the second decimal place and were rounded to two decimal places for presentation. WB: Walking Bouts; P90: 90th Percentile.

**Table S7**. Model fit comparison of linear and quadratic age effects for digital mobility outcomes

| Model Fit | Walking Duration | Number of steps | Number of total WB | Number of WB>30s | Mean walking speed in WB >30s | P90 walking speed in WB >30s |
| --- | --- | --- | --- | --- | --- | --- |
| AIC (linear age term) | 33065.9 | 62133.9 | 38890.8 | 28145.3 | -5540.9 | -2837.5 |
| AIC (quadratic age term) | 33070.3 | 62128.6 | 38894.1 | 28152.5 | -5528.7 | -2824.3 |
| ΔAIC | 4.42 | -5.25 | 3.26 | 7.20 | 12.14 | 13.16 |
| BIC (linear age term) | 33132.6 | 62200.1 | 38957.6 | 28212.0 | -5480.3 | -2770.8 |
| BIC (quadratic age term) | 33143.1 | 62201.4 | 38966.9 | 28225.2 | -5462.1 | -2751.6 |
| ΔBIC | 10.48 | 0.82 | 9.33 | 13.27 | 18.20 | 19.23 |
| χ² | 1.59 | 2.15 | 0.64 | 0.31 | 6.00 | 4.09 |
| Df | 1 | 1 | 1 | 1 | 1 | 1 |
| p-value | 0.207 | 0.142 | 0.423 | .577 | 0.014 | 0.043 |
| Model preference | linear | linear | linear | linear | linear | linear |

Notes: Presented are the model fit comparison between linear and quadratic age specifications for each digital mobility outcome. Lower AIC/BIC values and the χ² difference tests reflect whether adding the quadratic age term significantly improved model fit. Significant χ² values indicate that the quadratic specification provided a better fit than the linear model, whereas non-significant χ² tests suggest that the linear age term was sufficient. Based on that we report model preference. AIC, Aikake Information Criterion; ΔAIC, difference in Akaike Information Criterion between quadratic age term model and base model; BIC, Bayesian Information Criterion; ΔBIC, difference of Bayesian Information Criterion between quadratic age term model and base model; χ²= Chi²; WB: walking bout

**Table S8.** Descriptive results of Digital Mobility Outcomes (DMOs) differentiated by weekday

| **weekday** | *Walking duration, minutes/day* | | *Number of steps,*  *counts/day* | | *Number of total WBs counts/day* | | *Number of longer (>30s) WBs, counts/day* | | *Mean walking speed longer (>30s) in WBs, m/s* | | *P90 walking speed in longer (>30s) WB, m/s* | |
| --- | --- | --- | --- | --- | --- | --- | --- | --- | --- | --- | --- | --- |
| *Mean*  *SD* | *Md*  *(P25-P75)* | *Mean (SD)* | *Md*  *(P25 - P75)* | *Mean (SD)* | *Md*  *(P25 - P75)* | *Mean*  *(SD)* | *Md*  *(P25 -P75)* | *Mean*  *SD* | *Md*  *P25 - P75* | *Mean*  *SD* | *Md*  *(P25 - P75)* |
| Monday | 129.4 (56.1) | 124.4  (91.0 - 162.0) | 11 760 (5 362) | 11 194  (8 059 – 14 784) | 440.3  (151.7) | 436.5  (330.8 - 529.0) | 45.6  (26.7) | 41.0  (26.8 - 60.0) | 0.75 (0.13) | 0.75  (0.66 - 0.82) | 1.01  0.20 | 1.01  (0.87 - 1.15) |
| Tuesday | 127.3 (52.7) | 123.5  (89.0 - 160.8) | 11 608 (5 075) | 11 151  (7 960 - 14 744) | 439.0  (155.5) | 436.5  (335.8 - 550.0) | 44.4  (24.1) | 42.5  (26.8 - 58.0) | 0.75 (0.13) | 0.75  (0.67 - 0.84) | 1.01  0.20 | 1.02  (0.88 - 1.14) |
| Wednesday | 132.8 (54.9) | 127.4  (96.8 - 159.9) | 12 167 (5 336) | 11 402  (8 753 – 14 817) | 440.0  (153.0) | 426.0  (338.0 - 524.0) | 46.3  (25.9) | 41.0  (29.0 - 58.0) | 0.76 (0.13) | 0.76  (0.68 - 0.83) | 1.03  0.19 | 1.03  (0.91 - 1.15) |
| Thursday | 130.8 (55.7) | 127.1  (88.8 - 164.1) | 11 955 (5 381) | 11 413  (7 850 – 15 110) | 437.8  (152.7) | 442.0  (327.0 - 524.0) | 46.5  (27.1) | 42.0  (27.0 - 60.0) | 0.76 (0.13) | 0.76  (0.68 - 0.85) | 1.03  0.22 | 1.02  (0.90 - 1.15) |
| Friday | 132.8 (56.5) | 125.8  (92.8 - 162.5) | 12 082 (5 439) | 11 309  (8 241 – 14 971) | 452.3  (154.0) | 441.5  (348.8 - 555.3) | 46.8  (26.5) | 42.5  (28.0 - 60.0) | 0.75 (0.12) | 0.75  (0.67 - 0.83) | 1.02  0.20 | 1.01  (0.89 - 1.14) |
| Saturday | 129.2 (58.7) | 124.2  (86.3 - 164.1 | 11 751 (5 607) | 11 138  (7 538 – 14 909) | 436.4  (158.1) | 424.5  (326.8 - 536.5) | 44.5  (27.4) | 39.5  (25.0 - 58.0) | 0.75 0.13) | 0.74  (0.66 - 0.83) | 1.00  0.20 | 1.00  (0.88 - 1.13) |
| Sunday | 119.9 (58.9) | 113.1  (76.1 - 152.6) | 10 991 (5 735) | 10 347  (6 703 – 14 060) | 385.8  (143.0) | 370.5  (282.8 - 474.3) | 38.5  (25.3) | 33.0  (20.0 - 52.0) | 0.74 (0.14) | 0.73  (0.65 - 0.82) | 0.98  0.21 | 0.98  (0.84 - 1.11) |

Presented are mean values, standard deviations (SD), median values and 25th (P25) and 75th Percentile (P75).
